# Supplementary material for: Evaluation of the Audicor Acoustic Cardiography Device as a Diagnostic Tool in Horses with Mitral or Aortic Valve Insufficiency
Source: MDPI journal article supplement (doi:10.3390/ani14020331), 2024-01-21
Supplement: s1 [file s1]

Figure S2: Linear regression and Bland-Altman analysis

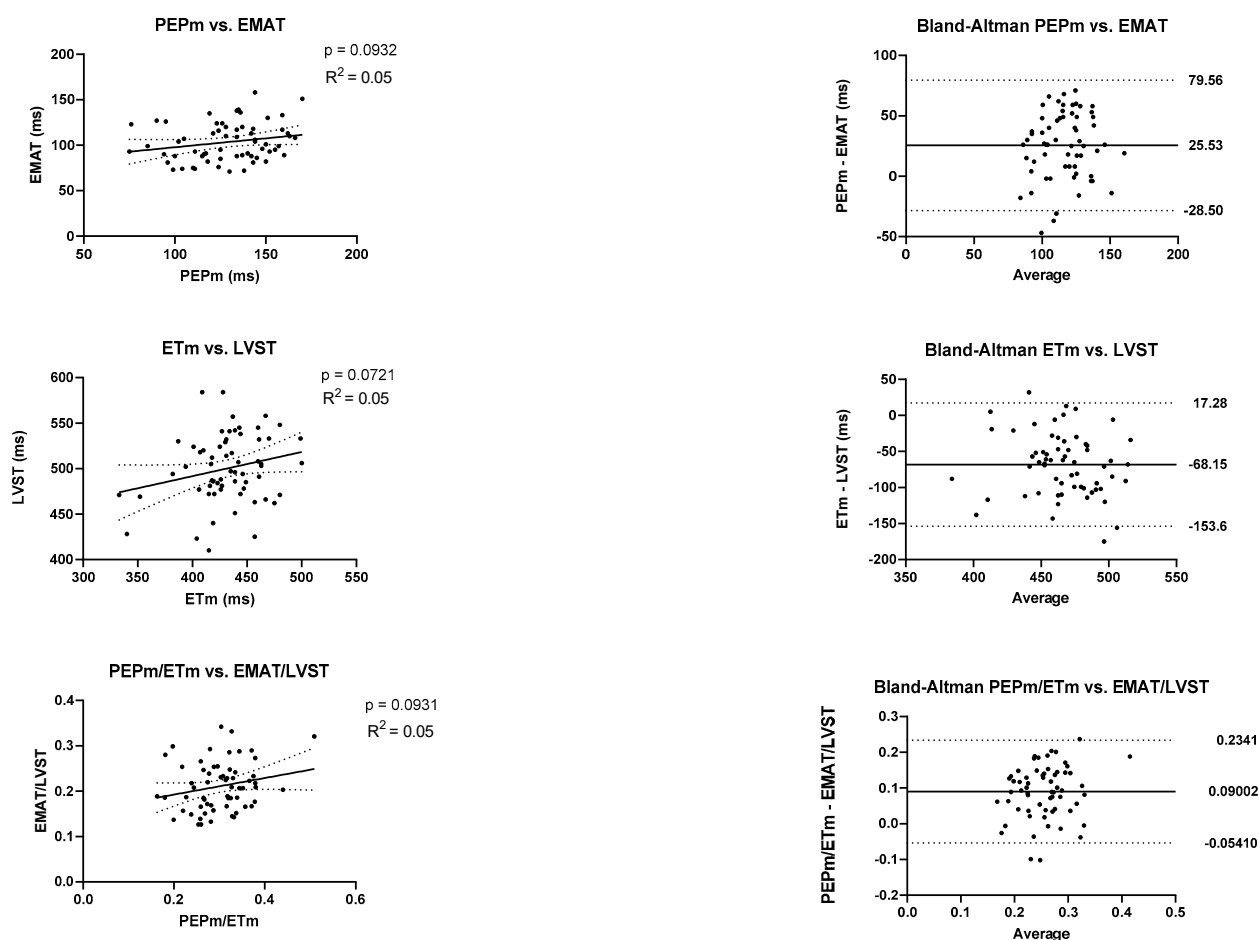

**Left**, linear regression analyses interrogating the relationship between the Audicor® snapshot variables (i.e., EMAT, LVST, EMAT/LVST) and the corresponding echocardiographic variables (i.e., PEP<sub>m</sub>, ET<sub>m</sub>, PEP<sub>m</sub>/ET<sub>m</sub>). The solid line represents the regression line, the dotted lines represent the 95% confidence intervals of the regression line. The P values and the coefficients of determination ( $R^2$ ) are displayed for each regression analysis.

**Right**, Bland-Altman analyses interrogating the mean bias and 95% limits of agreement for Audicor® snapshot variables (i.e., EMAT, LVST, EMAT/LVST) and the corresponding echocardiographic variables (i.e., PEP<sub>m</sub>, ET<sub>m</sub>, PEP<sub>m</sub>/ET<sub>m</sub>). The solid lines represent the mean bias, the dotted lines illustrate the lower and the upper 95% limit of agreement.
