# Supplementary material for: Evaluation of the Audicor Acoustic Cardiography Device as a Diagnostic Tool in Horses with Mitral or Aortic Valve Insufficiency
Source: MDPI journal article supplement (doi:10.3390/ani14020331), 2024-01-21
Supplement: s1 [file s1]

Scoring sheet S1: AR Severity Score

1. **Left ventricular size:** Left ventricular volume at end diastole, measured in a right-parasternal long-axis view using single-plane Simpson's method of discs, normalized to a body weight of 500 kg using methods of allometric scaling (also see Supplementary Material Table S1).

| LVIV <sub>d</sub> (500) [1] | Points |
|-----------------------------|--------|
| $\leq 1300$ mL              | 1      |
| 1301 – 1800 mL              | 2      |
| 1801 – 2300 mL              | 3      |
| $> 2300$ mL                 | 4      |

2. **Jet size:** Size of the regurgitant jet (as visualized by Color Flow Doppler) relative to the left ventricular outflow tract (LVOT) in a right-parasternal long-axis view.

| Jet size [2,3]               | Points |
|------------------------------|--------|
| $\leq \frac{1}{4}$ LVOT Area | 1      |
| $\leq \frac{1}{2}$ LVOT Area | 2      |
| $\leq \frac{3}{4}$ LVOT Area | 3      |
| $> \frac{3}{4}$ LVOT Area    | 4      |

3. **Subjective evaluation of the left ventricle:** Size and shape of the left ventricle in a right-parasternal long-axis view.

| Criteria evaluated [2]                                                                                                     | Points |
|----------------------------------------------------------------------------------------------------------------------------|--------|
| <ul style="list-style-type: none"> <li>• Normal ventricle, no enlargement</li> <li>• Normal apex shape</li> </ul>          | 1      |
| <ul style="list-style-type: none"> <li>• Normal ventricle, mild enlargement</li> <li>• Normal apex shape</li> </ul>        | 2      |
| <ul style="list-style-type: none"> <li>• Large ventricle, moderate enlargement</li> <li>• Round apex shape</li> </ul>      | 3      |
| <ul style="list-style-type: none"> <li>• Large ventricle, moderate enlargement</li> <li>• Globoid apex shape</li> </ul>    | 4      |
| <ul style="list-style-type: none"> <li>• Large ventricle, severe enlargement</li> <li>• Very globoid apex shape</li> </ul> | 5      |

#### 4. Total score

| Point Score | Severity |
|-------------|----------|
| 3 – 5       | Mild     |
| 6 – 9       | Moderate |
| 10 – 13     | Severe   |

#### References:

1. Berthoud, D.; Schwarzwald, C.C. Echocardiographic assessment of left ventricular size and systolic function in Warmblood horses using linear measurements, area-based indices, and volume estimates: A retrospective database analysis. *J. Vet. Intern. Med.* **2021**, *35*, 504-520.
2. Ven, S.; Decloedt, A.; Van Der Vekens, N.; De Clercq, D.; van Loon, G. Assessing aortic regurgitation severity from 2D, M-mode and pulsed wave Doppler echocardiographic measurements in horses. *The Veterinary Journal* **2016**, *210*, 34-38.
3. Young, L.; Rogers, K.; Wood, J. Heart murmurs and valvular regurgitation in thoroughbred racehorses: epidemiology and associations with athletic performance. *J. Vet. Intern. Med.* **2008**, *22*, 418-426.
