# Supplementary material for: Evaluation of the Audicor Acoustic Cardiography Device as a Diagnostic Tool in Horses with Mitral or Aortic Valve Insufficiency
Source: MDPI journal article supplement (doi:10.3390/ani14020331), 2024-01-21
Supplement: s1 [file s1]

Table S2: List of Audicor® acoustic cardiography variables.

| Variable | Unit              | Definition                                                                                                                                                                               |
|----------|-------------------|------------------------------------------------------------------------------------------------------------------------------------------------------------------------------------------|
| HR       | min <sup>-1</sup> | Heart rate                                                                                                                                                                               |
| QRS      | msec              | QRS duration                                                                                                                                                                             |
| QTc      | msec              | Rate-corrected QT interval (Bazett's equation)<br>QTc = QT/√RR, where QT = QT interval and RR = preceding RR interval                                                                    |
| EMAT     | msec              | Electromechanical activation time = Time interval between onset of the electrocardiographic Q wave and the first heart sound (S1)                                                        |
| LVST     | msec              | Left ventricular systolic time = Time interval between the first (S1) and the second heart sound (S2)                                                                                    |
| EMATc    | %                 | Rate-corrected EMAT = EMAT expressed as % of the length of the corresponding cardiac cycle (electrocardiographic RR interval)                                                            |
| LVSTc    | %                 | Rate-corrected LVST = LVST expressed as % of the length of the corresponding cardiac cycle (electrocardiographic RR interval)                                                            |
| S3       | -                 | Power (= function of the intensity and persistence) of the third heart (S3) sound, expressed as an index ranging between 0 and 10                                                        |
| S4       | -                 | Power (= function of the intensity and persistence) of the fourth heart (S4) sound, expressed as an index ranging between 0 and 10                                                       |
| SDI      | -                 | Systolic Dysfunction Index = Function of QRS duration, QT interval, EMATc and intensity of S3, expressed as an index ranging between 0 and 10.<br>SDI = f([QRS] × [QT] × [S3] × [EMATc]) |
