# Supplementary material for: Evaluation of the Audicor Acoustic Cardiography Device as a Diagnostic Tool in Horses with Mitral or Aortic Valve Insufficiency
Source: MDPI journal article supplement (doi:10.3390/ani14020331), 2024-01-21
Supplement: s1 [file s1]

Table S3: Description of the study sample.

| Group | No | Breed        | Age (y) | Sex | Body-weight (kg) | Dominant insufficiency |                      |                | Additional insufficiencies |                       |          | Audible Heart sounds |
|-------|----|--------------|---------|-----|------------------|------------------------|----------------------|----------------|----------------------------|-----------------------|----------|----------------------|
|       |    |              |         |     |                  | Valve                  | Murmur Grade (1-6/6) | Severity score | Valve                      | Murmur Grade (1-6/6)* | Severity |                      |
| HC    | 1  | Warmblood    | 18      | mc  | 505              | -                      | -                    | -              | Aorta                      | -                     | trivial  | S1, S2               |
|       |    |              |         |     |                  |                        |                      |                | Mitral                     | -                     | trivial  |                      |
|       |    |              |         |     |                  |                        |                      |                | Pulmonic                   | -                     | trivial  |                      |
| HC    | 2  | Warmblood    | 6       | mc  | 500              | -                      | -                    | -              | Mitral                     | -                     | trace    | S1, S2               |
| HC    | 3  | Standardbred | 14      | mc  | 470              | -                      | -                    | -              | Pulmonic                   | -                     | trace    | S1, S2, S3           |
|       |    |              |         |     |                  |                        |                      |                | Tricuspid                  | -                     | trace    |                      |
| HC    | 4  | Standardbred | 14      | mc  | 540              | -                      | -                    | -              | Mitral                     | -                     | trivial  | S1, S2, S3           |
|       |    |              |         |     |                  |                        |                      |                | Pulmonic                   | -                     | trivial  |                      |
|       |    |              |         |     |                  |                        |                      |                | Tricuspid                  | -                     | trivial  |                      |
| HC    | 5  | Warmblood    | 13      | mc  | 520              | -                      | -                    | -              | Aortic                     | -                     | trivial  | S1, S2               |
|       |    |              |         |     |                  |                        |                      |                | Tricuspid                  | -                     | trace    |                      |
| HC    | 6  | Warmblood    | 18      | mc  | 540              | -                      | -                    | -              |                            |                       |          | S1, S2               |
| HC    | 7  | Warmblood    | 5       | f   | 530              | -                      | -                    | -              |                            |                       |          | S1, S2, S3           |
| HC    | 8  | Warmblood    | 6       | mc  | 530              | -                      | -                    | -              |                            |                       |          | S1, S2               |
| HC    | 9  | Warmblood    | 15      | mc  | 580              | -                      | -                    | -              | Tricuspid                  | 3/6                   | mild     | S1, S2               |
| HC    | 10 | Warmblood    | 18      | f   | 575              | -                      | -                    | -              | Aortic                     | -                     | trivial  | S1, S2               |
| HC    | 11 | Warmblood    | 15      | f   | 500              | -                      | -                    | -              |                            |                       |          | S1, S2               |
| HC    | 12 | Warmblood    | 6       | f   | 525              | -                      | -                    | -              |                            |                       |          | S1, S2               |
| HC    | 13 | Warmblood    | 15      | f   | 575              | -                      | -                    | -              |                            |                       |          | S1, S2               |
| HC    | 14 | Warmblood    | 7       | f   | 575              | -                      | -                    | -              |                            |                       |          | S1, S2               |
| HC    | 15 | Warmblood    | 9       | f   | 500              | -                      | -                    | -              |                            |                       |          | S1, S2               |
| HC    | 16 | Warmblood    | 10      | f   | 575              | -                      | -                    | -              |                            |                       |          | S1, S2               |
| HC    | 17 | Warmblood    | 12      | mc  | 550              | -                      | -                    | -              |                            |                       |          |                      |
| MI    | 1  | Warmblood    | 10      | mc  | 570              | Mitral                 | 3/6                  | mild           | -                          |                       | -        | S1, S2               |
| MI    | 2  | Warmblood    | 18      | f   | 370              | Mitral                 | 3/6                  | mild           | -                          |                       | -        | S1, S2               |

|    |    |            |    |    |     |        |     |          |           |     |         |            |
|----|----|------------|----|----|-----|--------|-----|----------|-----------|-----|---------|------------|
| MI | 3  | Warmblood  | 20 | mc | 470 | Mitral | 4/6 | mild     | -         | -   | S1, S2  |            |
| MI | 4  | Warmblood  | 20 | f  | 540 | Mitral | 4/6 | mild     | -         | -   | S1, S2  |            |
| MI | 5  | Warmblood  | 28 | m  | 530 | Mitral | 4/6 | mild     | Aorta     | -   | trivial | S1, S2, S4 |
| MI | 6  | Warmblood  | 12 | f  | 620 | Mitral | 4/6 | mild     | Pulmonic  | -   | trivial | S1, S2     |
| MI | 7  | Warmblood  | 9  | f  | 600 | Mitral | 3/6 | mild     | Aorta     | -   | trivial | S1, S2     |
|    |    |            |    |    |     |        |     |          | Pulmonic  | -   | trivial |            |
| MI | 8  | Warmblood  | 19 | f  | 570 | Mitral | 3/6 | mild     | Aorta     | -   | trivial | S1, S2, S4 |
|    |    |            |    |    |     |        |     |          | Pulmonic  | -   | trivial |            |
| MI | 9  | Warmblood  | 17 | mc | 600 | Mitral | 3/6 | mild     | Aortic    | -   | trivial | S, S2, S4  |
|    |    |            |    |    |     |        |     |          | Pulmonic  | -   | trivial |            |
| MI | 10 | Warmblood  | 19 | f  | 650 | Mitral | 3/6 | mild     | Aortic    | -   | trivial | S1, S2     |
|    |    |            |    |    |     |        |     |          | Pulmonic  | -   | trivial |            |
| MI | 11 | Andalusian | 14 | m  | 510 | Mitral | 4/6 | mild     | Aortic    | -   | trivial | S1, S2     |
|    |    |            |    |    |     |        |     |          | Tricuspid | 2/6 | trace   |            |
| MI | 12 | Warmblood  | 8  | mc | 610 | Mitral | 3/6 | mild     | Aorta     | -   | trivial | S1, S2     |
|    |    |            |    |    |     |        |     |          | Pulmonic  | -   | trivial |            |
| MI | 13 | Warmblood  | 5  | f  | 480 | Mitral | 3/6 | mild     | Aorta     | -   | trivial | S1, S2, S4 |
|    |    |            |    |    |     |        |     |          | Pulmonic  | 2/6 | mild    |            |
| MI | 14 | Warmblood  | 18 | f  | 690 | Mitral | 2/6 | mild     | Aortic    | -   | trace   | S1, S2, S4 |
|    |    |            |    |    |     |        |     |          | Tricuspid | -   | trivial |            |
| MI | 15 | Warmblood  | 9  | f  | 520 | Mitral | 2/6 | mild     | Aortic    | -   | trivial | S1, S2     |
|    |    |            |    |    |     |        |     |          | Pulmonic  | -   | trivial |            |
|    |    |            |    |    |     |        |     |          | Tricuspid | 2/6 | mild    |            |
| MI | 16 | Warmblood  | 9  | mc | 605 | Mitral | 3/6 | mild     | Aortic    | -   | trivial | S1, S2     |
|    |    |            |    |    |     |        |     |          | Pulmonic  | -   | trace   |            |
|    |    |            |    |    |     |        |     |          | Tricuspid | 2/6 | mild    |            |
| MI | 17 | Warmblood  | 7  | f  | 530 | Mitral | 3/6 | mild     | Aortic    | -   | trace   | S1, S2, S4 |
|    |    |            |    |    |     |        |     |          | Pulmonic  | -   | trace   |            |
|    |    |            |    |    |     |        |     |          | Tricuspid | -   | trivial |            |
| MI | 18 | Warmblood  | 16 | mc | 540 | Mitral | 3/6 | mild     | Aortic    | -   | trace   | S1, S2     |
|    |    |            |    |    |     |        |     |          | Pulmonic  | -   | trace   |            |
|    |    |            |    |    |     |        |     |          | Tricuspid | -   | trivial |            |
| MI | 19 | Arabian    | 24 | mc | 440 | Mitral | 3/6 | mild     | Aortic    | -   | trivial | S1, S2     |
|    |    |            |    |    |     |        |     |          | Pulmonic  | -   | trivial |            |
|    |    |            |    |    |     |        |     |          | Tricuspid | -   | trivial |            |
| MI | 20 | Warmblood  | 16 | mc | 580 | Mitral | 4/6 | moderate | Pulmonic  | -   | trivial | S1, S2     |

|    |    |            |    |    |     |        |     |          |           |     |         |            |
|----|----|------------|----|----|-----|--------|-----|----------|-----------|-----|---------|------------|
| MI | 21 | Warmblood  | 5  | f  | 500 | Mitral | 6/6 | moderate | Aortic    | 2/6 | mild    | S1, S2     |
| MI | 22 | Warmblood  | 7  | mc | 560 | Mitral | 4/6 | moderate | Aortic    | -   | trivial | S1, S2     |
|    |    |            |    |    |     |        |     |          | Pulmonic  | -   | trivial |            |
| MI | 23 | Warmblood  | 7  | mc | 580 | Mitral | 4/6 | moderate | Aortic    | -   | mild    | S1, S2     |
|    |    |            |    |    |     |        |     |          | Tricuspid | -   | trivial |            |
| MI | 24 | Warmblood  | 18 | mc | 630 | Mitral | 6/6 | moderate | Aortic    | 2/6 | trace   | S1, S2     |
|    |    |            |    |    |     |        |     |          | Pulmonic  |     | trivial |            |
|    |    |            |    |    |     |        |     |          | Tricuspid |     | trivial |            |
| MI | 25 | Warmblood  | 14 | mc | 565 | Mitral | 3/6 | moderate | Aortic    | -   | trivial | S1, S2     |
|    |    |            |    |    |     |        |     |          | Pulmonic  | -   | trivial |            |
|    |    |            |    |    |     |        |     |          | Tricuspid | -   | trivial |            |
| MI | 26 | Warmblood  | 8  | f  | 500 | Mitral | 4/6 | moderate | Aortic    | -   | mild    | S1, S2     |
|    |    |            |    |    |     |        |     |          | Pulmonic  | -   | trivial |            |
|    |    |            |    |    |     |        |     |          | Tricuspid | -   | mild    |            |
| MI | 27 | Warmblood  | 4  | m  | 600 | Mitral | 4/6 | moderate | Aortic    | -   | trivial | S1, S2     |
|    |    |            |    |    |     |        |     |          | Pulmonic  | -   | mild    |            |
|    |    |            |    |    |     |        |     |          | Tricuspid | 2/6 | trivial |            |
| MI | 28 | Warmblood  | 20 | f  | 540 | Mitral | 4/6 | moderate | Aortic    |     | mild    | S1, S2, S4 |
|    |    |            |    |    |     |        |     |          | Pulmonic  |     | trivial |            |
|    |    |            |    |    |     |        |     |          | Tricuspid |     | trivial |            |
| AI | 1  | Freiberger | 16 | mc | 580 | Aorta  | 3/6 | mild     | -         |     | -       | S1, S2     |
| AI | 2  | Warmblood  | 10 | f  | 520 | Aorta  | 3/6 | mild     | Pulmonic  | -   | mild    | S1, S2     |
| AI | 3  | Warmblood  | 20 | f  | 590 | Aorta  | 4/6 | mild     | Mitral    | -   | trivial | S1, S2     |
| AI | 4  | Warmblood  | 11 | mc | 640 | Aorta  | 4/6 | moderate | -         |     | -       | S1, S2     |
| AI | 5  | Friesian   | 15 | mc | 540 | Aorta  | 3/6 | moderate | -         |     | -       | S1, S2     |
| AI | 6  | Warmblood  | 19 | f  | 585 | Aorta  | 4/6 | moderate | -         |     | -       | S1, S2     |
| AI | 7  | Warmblood  | 16 | f  | 640 | Aorta  | 5/6 | moderate | Mitral    | -   | trivial | S1, S2, S4 |
| AI | 8  | Warmblood  | 19 | mc | 540 | Aorta  | 4/6 | moderate | Mitral    | -   | trace   | S1, S2     |
| AI | 9  | Warmblood  | 22 | mc | 605 | Aorta  | 4/6 | moderate | Pulmonic  | -   | trivial | S1, S2     |
| AI | 10 | Warmblood  | 21 | mc | 705 | Aorta  | 4/6 | moderate | Mitral    | 3/6 | mild    | S1, S2     |
| AI | 11 | Warmblood  | 15 | mc | 510 | Aorta  | 2/6 | moderate | Mitral    |     | trivial | S1, S2     |
|    |    |            |    |    |     |        |     |          | Tricuspid |     | trivial |            |
| AI | 12 | Arabian    | 25 | f  | 520 | Aorta  | 4/6 | moderate | Mitral    | 2/6 | mild    | S1, S2     |
|    |    |            |    |    |     |        |     |          | Pulmonic  |     | trivial |            |

|    |    |           |    |    |     |       |     |        |           |     |          |            |
|----|----|-----------|----|----|-----|-------|-----|--------|-----------|-----|----------|------------|
|    |    |           |    |    |     |       |     |        | Tricuspid |     | mild     |            |
| AI | 13 | Warmblood | 27 | f  | 530 | Aorta | 6/6 | severe | -         | -   | -        | S1, S2     |
| AI | 14 | Warmblood | 18 | mc | 575 | Aorta | 4/6 | severe | -         | -   | -        | S1, S2, S4 |
| AI | 15 | Arabian   | 22 | mc | 400 | Aorta | 3/6 | severe | -         | -   | -        | S1, S2     |
| AI | 16 | Warmblood | 22 | mc | 590 | Aorta | 4/6 | severe | Mitral    | -   | mild     | S1, S2     |
| AI | 17 | Friesian  | 27 | mc | 520 | Aorta | 6/6 | severe | Mitral    | -   | trace    | S1, S2     |
|    |    |           |    |    |     |       |     |        | Pulmonic  | -   | trivial  |            |
| AI | 18 | Arabian   | 21 | m  | 390 | Aorta | 4/6 | severe | Mitral    | 2/6 | moderate | S1, S2, S4 |
|    |    |           |    |    |     |       |     |        | Pulmonic  | -   | mild     |            |
|    |    |           |    |    |     |       |     |        | Tricuspid | -   | trivial  |            |

f=female; m=male; mc=male castrated

\*Murmur grade = -, no murmur audible on auscultation and reported findings are based on color flow Doppler
