# Supplementary material for: Evaluation of the Audicor Acoustic Cardiography Device as a Diagnostic Tool in Horses with Mitral or Aortic Valve Insufficiency
Source: MDPI journal article supplement (doi:10.3390/ani14020331), 2024-01-21
Supplement: s1 [file s1]

Table S1: List of echocardiographic variables.

| Measurements of left atrial (LA) size and function (2DE, right-parasternal long-axis view of left atrium and left ventricle, optimized to image the LA)                                                                            |                 |                                                                                                                                                                                                       |
|------------------------------------------------------------------------------------------------------------------------------------------------------------------------------------------------------------------------------------|-----------------|-------------------------------------------------------------------------------------------------------------------------------------------------------------------------------------------------------|
| LAD <sub>max</sub>                                                                                                                                                                                                                 | cm              | Internal left atrial diameter measured at the widest distance parallel to the mitral valve annulus at the time of maximum atrial filling (one frame before mitral valve opening)                      |
| LAD <sub>max</sub> (500)                                                                                                                                                                                                           | cm              | LAD <sub>max</sub> corrected to a BWT of 500kg                                                                                                                                                        |
| LAA <sub>max</sub>                                                                                                                                                                                                                 | cm <sup>2</sup> | Internal left atrial area measured during maximum atrial filling (one frame before mitral valve opening)                                                                                              |
| LAA <sub>max</sub> (500)                                                                                                                                                                                                           | cm <sup>2</sup> | LAA <sub>max</sub> corrected to a BWT of 500kg                                                                                                                                                        |
| LAA <sub>a</sub>                                                                                                                                                                                                                   | cm <sup>2</sup> | Internal left atrial area measured at the onset of active atrial contraction (at the onset of the electrocardiographic P wave)                                                                        |
| LAA <sub>min</sub>                                                                                                                                                                                                                 | cm <sup>2</sup> | Internal left atrial area measured during minimum atrial filling (at the time of closure of the mitral valve)                                                                                         |
| Active LA FAC                                                                                                                                                                                                                      | %               | Active LA fractional area change<br>(Active LA FAC = $LAA_a - LAA_{min} / LAA_a$ )                                                                                                                    |
| Measurements of left atrial size (2DE, right-parasternal short-axis view at the aortic valve level, optimized for the left atrium and left-atrial appendage)                                                                       |                 |                                                                                                                                                                                                       |
| LA <sub>sx</sub> A <sub>max</sub> (500)                                                                                                                                                                                            | cm <sup>2</sup> | LA area at end-systole (closure of aortic valve) corrected to a BWT of 500kg                                                                                                                          |
| Linear measurements of LV size and function (M-mode, right-parasternal short-axis view of the left ventricle at the chordal level)                                                                                                 |                 |                                                                                                                                                                                                       |
| LVID <sub>d</sub> , LVID <sub>s</sub>                                                                                                                                                                                              | cm              | Left ventricular internal diameter at end-diastole (at the onset of the electrocardiographic QRS complex) and at peak-systole (at the time at which the left ventricular internal lumen is narrowest) |
| LVID <sub>d</sub> (500)                                                                                                                                                                                                            | cm              | LVID <sub>d</sub> corrected to a BWT of 500kg                                                                                                                                                         |
| LV FS                                                                                                                                                                                                                              | %               | Left ventricular fractional shortening<br>(LV FS = $(LVID_d - LVID_s) / LVID_d \times 100$ )                                                                                                          |
| LAD <sub>max</sub> /LVID <sub>d</sub>                                                                                                                                                                                              | -               | LAD <sub>max</sub> -to-LVID <sub>d</sub> ratio                                                                                                                                                        |
| Volumetric estimates of LV size and function (2DE, right-parasternal long-axis view of left atrium and left ventricle, optimized to image the LV, single-plane Simpson's model of discs)                                           |                 |                                                                                                                                                                                                       |
| LVIV <sub>d</sub> , LVIV <sub>s</sub>                                                                                                                                                                                              | mL              | Left ventricular internal volume at end-diastole and at peak systole                                                                                                                                  |
| LVIV <sub>d</sub> (500)                                                                                                                                                                                                            | mL              | LVIV <sub>d</sub> corrected to a BWT of 500kg                                                                                                                                                         |
| LV EF                                                                                                                                                                                                                              | %               | Left ventricular ejection fraction<br>(LV EF = $(LVIV_d - LVIV_s) / LVIV_d \times 100$ )                                                                                                              |
| Variables characterizing left atrial and left ventricular mechanical function (pulsed-wave tissue Doppler imaging of the left ventricular free wall, right-parasternal short-axis view of the left ventricle at the chordal level) |                 |                                                                                                                                                                                                       |
| PEP <sub>m</sub>                                                                                                                                                                                                                   | msec            | Pre-ejection period                                                                                                                                                                                   |
| ET <sub>m</sub>                                                                                                                                                                                                                    | msec            | Ejection time                                                                                                                                                                                         |
| PEP <sub>m</sub> /ET <sub>m</sub>                                                                                                                                                                                                  | -               | PEP <sub>m</sub> :ET <sub>m</sub> ratio                                                                                                                                                               |
| IVCT <sub>m</sub>                                                                                                                                                                                                                  | msec            | Isovolumetric contraction time (onset S1 to onset S <sub>m</sub> )                                                                                                                                    |
| IVRT <sub>m</sub>                                                                                                                                                                                                                  | msec            | Isovolumetric relaxation time (onset E1 to onset E <sub>m</sub> )                                                                                                                                     |
| IMP <sub>m</sub>                                                                                                                                                                                                                   | -               | Index of myocardial performance<br>(IMP <sub>m</sub> = $(IVCT_m + IVRT_m) / ET_m$ )                                                                                                                   |
| E <sub>m</sub>                                                                                                                                                                                                                     | cm/sec          | Maximum wall motion velocity during early diastole (corresponding to passive ventricular filling)                                                                                                     |
| A <sub>m</sub>                                                                                                                                                                                                                     | cm/sec          | Maximum wall motion velocity during late diastole (corresponding to atrial contraction)                                                                                                               |
| E <sub>m</sub> /A <sub>m</sub>                                                                                                                                                                                                     | -               | E <sub>m</sub> :A <sub>m</sub> ratio                                                                                                                                                                  |
