# Supplementary material for: Evaluation of the Audicor Acoustic Cardiography Device as a Diagnostic Tool in Horses with Mitral or Aortic Valve Insufficiency
Source: MDPI journal article supplement (doi:10.3390/ani14020331), 2024-01-21
Supplement: s1 [file s1]

Scoring sheet S2: MR Severity Score

1. **Left atrial size:** Maximum left atrial area at end systole, measured in a right-parasternal long-axis view optimized to image the left atrium, normalized to a body weight of 500 kg using methods of allometric scaling (also see Supplementary Material Table S1).

| LAA <sub>max</sub> (500) [1] | Points |
|------------------------------|--------|
| $\leq 100 \text{ cm}^2$      | 1      |
| 101 – 120 $\text{cm}^2$      | 2      |
| 121 – 140 $\text{cm}^2$      | 3      |
| $> 140 \text{ cm}^2$         | 4      |

2. **Jet size:** Size of the regurgitant jet (as visualized by Color Flow Doppler) relative to the left atrial area in a right-parasternal long-axis four chamber view, optimized to image the left atrium.

| Jet size compared to LAA [2]       | Points |
|------------------------------------|--------|
| $\leq \frac{1}{4} \text{ LA Area}$ | 1      |
| $\leq \frac{1}{2} \text{ LA Area}$ | 2      |
| $\leq \frac{3}{4} \text{ LA Area}$ | 3      |
| $> \frac{3}{4} \text{ LA Area}$    | 4      |

3. **Subjective evaluation:** Size and shape of the left atria in a right-parasternal long-axis view, optimized to image the left atrium.

| Criteria evaluated                                                                                    | Points |
|-------------------------------------------------------------------------------------------------------|--------|
| <ul style="list-style-type: none"> <li>• Normal LA, no enlargement</li> <li>• Normal shape</li> </ul> | 1      |
| <ul style="list-style-type: none"> <li>• Mild enlargement</li> <li>• Normal shape</li> </ul>          | 2      |
| <ul style="list-style-type: none"> <li>• Moderate enlargement</li> <li>• Rounded shape</li> </ul>     | 3      |
| <ul style="list-style-type: none"> <li>• Severely enlarged atrium</li> <li>• Very round</li> </ul>    | 4      |

#### 4. Total score

| Point Score | Severity |
|-------------|----------|
| 3 – 5       | Mild     |
| 6 – 9       | Moderate |
| 10 – 12     | Severe   |

#### References:

1. Huesler, I.M.; Mitchell, K.J.; Schwarzwald, C.C. Echocardiographic Assessment of Left Atrial Size and Function in Warmblood Horses: Reference Intervals, Allometric Scaling, and Agreement of Different Echocardiographic Variables. *J. Vet. Intern. Med.* **2016**, *30*, 1241-1252.
2. Young, L.; Rogers, K.; Wood, J. Heart murmurs and valvular regurgitation in thoroughbred racehorses: epidemiology and associations with athletic performance. *J. Vet. Intern. Med.* **2008**, *22*, 418-426.
