# Supplementary material for: Evaluation of the Audicor Acoustic Cardiography Device as a Diagnostic Tool in Horses with Mitral or Aortic Valve Insufficiency
Source: Animals (Basel). 2024 Jan 21;14(2):331. doi: 10.3390/ani14020331 (PMC10812805; doi:10.3390/ani14020331)
Supplement: Supplementary file 1 [file animals-14-00331-s001.zip]

Archive with 7 entries (7 files):
- Suppl_Figure S1_Audicor device attached.JPG
- Suppl_Figure S2_Linear Regression and Bland Altman analysis.pdf
- Suppl_Scoring sheet S1_AR Severity Score_.pdf
- Suppl_Scoring sheet S2_MR Severity Score.pdf
- Suppl_Table S1_List of echocardiographic variables.pdf
- Suppl_Table S2_List of Audicor acoustic cardiography variables.pdf
- Suppl_Table S3_Description of the study sample.pdf
